# Supplementary material for: Gene-based association study for lipid traits in diverse cohorts implicates BACE1 and SIDT2 regulation in triglyceride levels
Source: PeerJ. 2018 Jan 29;6:e4314. doi: 10.7717/peerj.4314 (PMC5793713; doi:10.7717/peerj.4314)
Supplement: Table S1 — Comparison of individual SNP results for the Cebu Longitudinal Health and Nutrition Survey in Wu et al. (2013) and our study. [file peerj-06-4314-s001.xlsx]

## Sheet: Wu vs Andaleon
Supplemental Table 1: Comparison of individual SNP results for the Cebu Longitudinal Health and Nutrition Survey for Wu et al. (2013) and our study
			Wu et al. (2013)					Andaleon et al. (2017)
		N	1782 mothers, 1719 offspring					1765 mothers
Locus	SNP	Pheno	Effect	Other	EAF	Beta (SE)	P	Effect	Other	EAF	Beta (SE)	P
APOE	rs7412	LDL	T	C	0.12	-0.48 (0.04)	1.6e-27	NA	NA	NA	NA	NA
APOE	rs7412	CHOL	T	C	0.12	-0.08 (0.01)	1.8e-14	NA	NA	NA	NA	NA
APOA5	rs662799	TRIG	A	G	0.76	-0.18 (0.02)	3.1e-18	A	G	0.755	-0.342 (0.041)	2.727e-16
GCKR	rs780092	TRIG	A	G	0.68	0.09 (0.02)	1.6e-07	G	A	0.321	-0.186 (0.036)	2.25361e-07
CETP	rs1800775	HDL	A	C	0.4	0.05 (0.01)	6.3e-07	A	C	0.392	0.195 (0.036)	6.82437e-08
TOM1	rs138777	HDL	G	A	0.59	0.05 (0.01)	5e-07	G	A	0.591	0.175 (0.036)	1.57635e-06
LPL	rs328	TRIG	NA	NA	0.95	0.11 (0.04)	0.0079	G	C	0.053	-0.203 (0.083)	0.0146908
MLXIPL	rs17145738	TRIG	NA	NA	0.1	-0.05 (0.03)	0.077	T	C	0.102	-0.119 (0.057)	0.0462899
ANGPTL3	rs2131925	TRIG	NA	NA	0.71	0.04 (0.02)	0.036	T	G	0.709	0.071 (0.038)	0.0608318
LIPC	rs1532085	HDL	NA	NA	0.43	-0.04 (0.01)	0.00026	A	G	0.403	-1.634 (0.036)	8e-06
LIPG	rs2156552	HDL	NA	NA	0.14	-0.02 (0.01)	0.075	T	A	0.856	0.057 (0.048)	0.231155
MMAB-MVK	rs10774708	HDL	NA	NA	0.62	-0.02 (0.01)	0.076	G	A	0.384	0.099 (0.035)	0.00478099
APOB	rs1367117	LDL	NA	NA	0.88	-0.09 (0.05)	0.047	A	G	0.116	0.104 (0.054)	0.055275
TIMD4	rs6882076	CHOL	NA	NA	0.65	0.01 (0.01)	0.06	C	T	0.649	0.085 (0.036)	0.0183267
