# Supplementary material for: Gene-based association study for lipid traits in diverse cohorts implicates BACE1 and SIDT2 regulation in triglyceride levels
Source: PeerJ. 2018 Jan 29;6:e4314. doi: 10.7717/peerj.4314 (PMC5793713; doi:10.7717/peerj.4314)
Supplement: Table S4 — Results for XPEB performed on the Cebu cohort using GLGC as a base population. [file peerj-06-4314-s004.xlsx]

## Sheet: Sheet1
Supplemental Table 4: Results for XPEB performed on our Cebu cohort using GLGC as a base population. Only the top ten SNPs from each phenotype are included.
Pheno.	Chr.	Position	Nearest gene	SNP	FDR	P
CHOL	2	27750139	GCKR	rs6744393	0.00478746	3.57381e-05
CHOL	20	39678289	TOP1	rs6016505	0.00321061	1.87217e-05
CHOL	20	39634366	AK023614	rs1000410	0.00321192	4.03014e-06
CHOL	20	39640879	AK023614	rs6016501	0.00373907	3.52397e-06
CHOL	20	39672618	TOP1	rs6029526	0.00535087	4.90597e-05
CHOL	20	39913632	ZHX3	rs2179372	0.00535088	4.19348e-05
CHOL	20	39788855	PLCG1	rs2076148	0.00598032	6.23978e-05
CHOL	20	39636663	AK023614	rs6029516	0.00627494	4.49529e-06
CHOL	20	39774163	PLCG1	rs3795128	0.00664493	6.79207e-05
CHOL	20	39760448	BC035080	rs6029552	0.00664493	7.6475e-05
HDL	15	58695948	LIPC	rs74338752	0.0122192	1.97481e-05
HDL	15	58695592	LIPC	rs79111033	0.0138566	2.39e-05
HDL	15	58694657	LIPC	rs76686550	0.0156664	3.05791e-05
HDL	15	58692202	LIPC	rs12708454	0.0175312	3.72693e-05
HDL	15	58688478	LIPC	rs920917	0.0240574	7.36947e-05
HDL	15	58681128	LIPC	rs75437656	0.0264754	8.468e-05
HDL	15	58686939	LIPC	rs261301	0.0373125	0.000202593
HDL	16	56991495	CETP	rs6499861	0.015659	2.58689e-05
HDL	16	56991524	CETP	rs6499862	0.015659	2.72534e-05
HDL	16	56986914	HERPUD1	rs7205692	0.0217624	5.93974e-05
TRIG	11	116624727	BUD13	rs7930786	1.48926e-10	6.09524e-13
TRIG	11	116648917	ZNF259	rs964184	1.48926e-10	3.03709e-13
TRIG	11	116661826	APOA5	rs2072560	1.48926e-10	4.47674e-13
TRIG	11	116607368	BUD13	rs1558860	2.97304e-10	8.55859e-13
TRIG	11	116607437	BUD13	rs1558861	2.97304e-10	8.47164e-13
TRIG	11	116640237	BUD13	rs6589565	2.97304e-10	9.61376e-13
TRIG	11	116656788	ZNF259	rs10750096	2.97304e-10	8.22666e-13
TRIG	11	116623659	BCHE	rs180327	1.11025e-09	2.7231e-12
TRIG	11	116657561	ZNF259	rs3741298	2.08005e-09	6.51327e-12
TRIG	11	116651115	AK023614	rs11604424	3.82006e-09	1.26064e-11
LDL	20	39634366	AK023614	rs1000410	0.0111181	6.46511e-05
LDL	20	39640879	AK023614	rs6016501	0.0111181	6.07274e-05
LDL	20	39678289	TOP1	rs6016505	0.011409	0.000199732
LDL	20	39672618	TOP1	rs6029526	0.0141574	0.000355796
LDL	20	39754695	BC035080	rs6029549	0.0160906	0.000506707
LDL	20	39760448	BC035080	rs6029552	0.0160906	0.000493748
LDL	20	39774163	PLCG1	rs3795128	0.0160906	0.000494169
LDL	20	39960342	LIPN3	rs6029632	0.0161243	0.00054154
LDL	20	39746403	BC035080	rs6129760	0.0170828	0.00061036
LDL	20	39788855	PLCG1	rs2076148	0.0170828	0.000620495
